# Supplementary material for: Reciprocal discoidin domain receptor signaling strengthens integrin adhesion to connect adjacent tissues
Source: eLife. 2023 Jul 5;12:RP87037. doi: 10.7554/eLife.87037 (PMC10328527; doi:10.7554/eLife.87037)
Supplement: Figure 2—source data 1. — Raw data of uterine prolapse frequency used to generate Figure 2B in Microsoft Excel format. [file elife-87037-fig2-data1.xlsx]

## Sheet: Figure 2—Source data 1
Figure 2—Source data 1. Source data for Figure 2. Raw data of uterine prolapse frequency used to generate Figure 2B.
Genotype/treatment	% of animals with uterine prolapse
	Trial 1	Trial 2	Trial 3
Wild type	2	6	10
emb-9 RNAi	100	100	100
ddr-1(ok874)	4	8	4
ddr-1(tm382)	2	8	6
ddr-2(ok574)	10	16	12
ddr-2(qy64)	18	28	16
ddr-2(tm797)	16	36	28
