# Supplementary material for: Reciprocal discoidin domain receptor signaling strengthens integrin adhesion to connect adjacent tissues
Source: eLife. 2023 Jul 5;12:RP87037. doi: 10.7554/eLife.87037 (PMC10328527; doi:10.7554/eLife.87037)
Supplement: Figure 3—figure supplement 1—source data 1. — Raw data of DDR-2::mNG and mCherry-tagged vesicle marker co-localization analysis used to generate boxplots in Figure 3—figure supplement 1B and C in Microsoft Excel format. [file elife-87037-fig3-figsupp1-data1.xlsx]

## Sheet: Figure 3—figure supplement 1—So
Figure 3—figure supplement 1—Source data 1. Source data for Figure 3—figure supplement 1. Raw data of DDR-2::mNG and mCherry-tagged vesicle marker co-localization analysis used to generate boxplots in Figure 3—figure supplement 1B and C.
Vesicle marker expressed in utse	Worm	Total number of DDR-2 punctae in single utse arm	Number of DDR-2 punctae in contact with vesicle marker	Percentage of DDR-2 punctae in contact with vesicle marker		Vesicle marker expressed in seam	Worm	Total number of DDR-2 punctae in single utse arm	Number of DDR-2 punctae in contact with vesicle marker	Percentage of DDR-2 punctae in contact with vesicle marker
mCherry::RAB-5	1	14	5	35.7143		mKate2::RAB-5	1	26	13	50
	2	11	8	72.7273			2	24	11	45.8333
	3	12	9	75			3	30	14	46.6667
	4	14	8	57.1429			4	21	10	47.619
	5	8	6	75			5	24	16	66.6667
	6	16	3	18.75			6	27	14	51.8519
	7	7	5	71.4286			7	27	18	66.6667
	8	4	2	50			8	33	17	51.5152
	9	16	9	56.25			9	27	17	62.963
	10	28	9	32.1429			10	24	16	66.6667
mCherry::RAB-7	1	4	2	50			11	28	18	64.2857
	2	11	2	18.1818			12	22	14	63.6364
	3	15	4	26.6667			13	36	14	38.8889
	4	14	3	21.4286			14	24	20	83.3333
	5	23	13	56.5217			15	27	14	51.8519
	6	22	10	45.4545
	7	15	1	6.66667
	8	6	1	16.6667
	9	11	6	54.5455
	10	7	3	42.8571
mCherry::RAB-11	1	13	3	23.0769
	2	8	1	12.5
	3	20	9	45
	4	7	1	14.2857
	5	16	11	68.75
	6	13	6	46.1538
	7	9	4	44.4444
	8	7	2	28.5714
	9	16	10	62.5
	10	9	1	11.1111
