# Supplementary material for: Reciprocal discoidin domain receptor signaling strengthens integrin adhesion to connect adjacent tissues
Source: eLife. 2023 Jul 5;12:RP87037. doi: 10.7554/eLife.87037 (PMC10328527; doi:10.7554/eLife.87037)
Supplement: Figure 4—figure supplement 1—source data 1. — Raw data of knockdown efficiency quantification for Figure 4—figure supplement 1 in Microsoft Excel format. [file elife-87037-fig4-figsupp1-data1.xlsx]

## Sheet: Figure 4—figure supplement 1—So
Figure 4—figure supplement 1—Source data 1. Source data for Figure 4—figure supplement 1. Raw data of knockdown efficiency quantification for Figure 4—figure supplement 1.
Treatment	Worm	EMB-9::mRuby2 Mean fluorescence intensity (utse-seam connection)				Treatment	Worm	COL-99::mNG Mean fluorescence intensity (muscle)				Treatment	Worm	CLE-1::mNG Mean fluorescence intensity (utse-seam connection)				Treatment	Worm	HIM-4::mNG Mean fluorescence intensity (utse-seam connection)
		Raw signal	Background	Corrected signal				Raw signal	Background	Corrected signal				Raw signal	Background	Corrected signal				Raw signal	Background	Corrected signal
Control RNAi	1	921.441	189.308	732.133		Control RNAi	1	207.768	121.9	85.868		Control RNAi	1	14858.7	3940.42	10918.3		Control RNAi	1	10612.9	3679.79	6933.12
	2	796.511	192.983	603.528			2	156.152	125.969	30.183			2	16340.7	4098.67	12242			2	14869.8	3821.24	11048.5
	3	815.253	197.246	618.007			3	166.523	124.796	41.727			3	15866.5	4302.55	11563.9			3	9985.77	3492.85	6492.92
	4	791.24	207.762	583.478			4	221.654	119.707	101.947			4	17786.6	3924.69	13861.9			4	11404.9	3767.44	7637.51
	5	792.369	193.221	599.148			5	199.505	122.525	76.98			5	19484.7	4003.05	15481.7			5	11617.8	3521.21	8096.56
	6	932.152	190.683	741.469			6	209.832	123.38	86.452			6	16386.6	4321.22	12065.4			6	10193.4	3657.54	6535.84
	7	998.284	218.983	779.301			7	271.032	128.051	142.981			7	18277.3	4270.5	14006.8			7	16028.3	3677.3	12351
	8	935.521	179.301	756.22			8	184.774	127.292	57.482			8	19181.7	4574.93	14606.8			8	14307.9	3635.55	10672.3
	9	1215.6	251.167	964.434			9	241.398	122.118	119.28			9	12422.5	4076.17	8346.36			9	12416.7	3582.25	8834.41
	10	1268.86	203.807	1065.05			10	234.253	127.871	106.382			10	17548.3	4520.11	13028.1			10	13292.9	3790.26	9502.69
emb-9 RNAi	1	456.73	153.748	302.982			11	180.805	121.298	59.507			11	16485.5	4219.56	12265.9		him-4 RNAi	1	4036.29	3342.92	693.365
	2	306.206	155.151	151.055			12	241.303	122.024	119.279			12	15112.1	4126.58	10985.6			2	4101.89	3210.47	891.417
	3	416.142	163.784	252.358			13	207.941	121.182	86.759			13	18253.8	4404.38	13849.4			3	4368.56	3557.57	810.995
	4	337.242	152.098	185.144			14	226.765	124.342	102.423			14	21534.6	4261.47	17273.1			4	4138.25	3385.41	752.837
	5	245.605	142.181	103.424			15	210.246	127.257	82.989			15	16156.8	4030.29	12126.5			5	4408.02	3610.13	797.889
	6	381.203	165.027	216.176		col-99 RNAi	1	135.287	126.864	8.423			16	15122.6	4868.19	10254.4			6	3660.47	3134.2	526.271
	7	269.714	140.508	129.206			2	125.753	118.955	6.798			17	20147.4	3599.82	16547.6			7	3828.12	3170.84	657.28
	8	270.702	139.864	130.838			3	121.708	117.31	4.398			18	17331.2	4633.14	12698			8	4147.8	3276.53	871.271
							4	124.213	113.578	10.635			19	21252.8	4039.57	17213.2			9	3941.64	3298.44	643.207
							5	118.429	116.63	1.799		cle-1 RNAi	1	8804.84	4177.49	4627.35			10	3947.82	3240.21	707.607
							6	121.434	119.143	2.291			2	6143.72	3823.05	2320.66
							7	127.188	114.677	12.511			3	7615.12	4203.95	3411.17
							8	131.708	124.319	7.389			4	8152.01	3991.51	4160.5
							9	133.342	121.2	12.142			5	7413.85	4049	3364.85
							10	132.52	124.013	8.507			6	8142.86	4185.31	3957.55
							11	134.989	123.231	11.758			7	7830.57	3918.43	3912.13
							12	153.165	127.182	25.983			8	8982.28	4743.02	4239.26
							13	130.271	126.339	3.932			9	6107.76	4490.38	1617.39
													10	6447.89	3928.76	2519.14
													11	6453.12	4294.52	2158.6
													12	5908.2	4111.96	1796.24
													13	6306.22	4532.24	1773.98
													14	7775.63	4471.67	3303.97
													15	8937.75	4381.34	4556.41
													16	6361.37	3894.43	2466.94
