# Supplementary material for: Reciprocal discoidin domain receptor signaling strengthens integrin adhesion to connect adjacent tissues
Source: eLife. 2023 Jul 5;12:RP87037. doi: 10.7554/eLife.87037 (PMC10328527; doi:10.7554/eLife.87037)
Supplement: Figure 4—figure supplement 2—source data 1. — Raw data of fluorescence intensity quantification for Figure 4—figure supplement 2 in Microsoft Excel format. [file elife-87037-fig4-figsupp2-data1.xlsx]

## Sheet: Figure 4—figure supplement 2—So
Figure 4—figure supplement 2—Source data 1. Source data for Figure 4—figure supplement 2. Raw data of fluorescence intensity quantification for Figure 4—figure supplement 2.
Treatment	Worm	DDR-2::mNG Mean fluorescence intensity (utse-seam connection)				Treatment	Worm	mNG::FBL-1 Mean fluorescence intensity (utse-seam connection)				Treatment	Worm	HIM-4::mNG Mean fluorescence intensity (utse-seam connection)				Treatment	Worm	HIM-4::mNG Mean fluorescence intensity (utse-seam connection)				Treatment	Worm	EMB-9::mRuby2 Mean fluorescence intensity (utse-seam connection)				Treatment	Worm	ZMP-4::GFP Mean fluorescence intensity (utse-seam connection)
		Raw signal	Background	Corrected signal				Raw signal	Background	Corrected signal				Raw signal	Background	Corrected signal				Raw signal	Background	Corrected signal				Raw signal	Background	Corrected signal				Raw signal	Background	Corrected signal
Control RNAi	1	15233.6	2938.88	12294.7		Control RNAi	1	14043.2	2558.9	11484.3		Control RNAi	1	21431.2	3935.69	17495.5		Control RNAi	1	1923.11	693.561	1229.55		Control RNAi	1	8652.9	2562.22	6090.68		Control RNAi	1	5735.16	2643.98	3091.18
	2	19382.8	3030.93	16351.9			2	14588.3	2534.05	12054.2			2	20579.4	4056.25	16523.2			2	2332.79	697.245	1635.54			2	5589.3	2531.6	3057.7			2	5203.23	2515.84	2687.39
	3	16097	2810.73	13286.2			3	13437.8	2639.52	10798.3			3	36472.8	4344.04	32128.7			3	2246.15	561.693	1684.46			3	7986.15	2567.72	5418.43			3	5119.72	2534.82	2584.9
	4	13180.1	2969.11	10210.9			4	17223.9	2594.6	14629.3			4	17482.2	3713.74	13768.4			4	2147.18	605.412	1541.77			4	7074.19	2510.18	4564.01			4	5281.09	2538.72	2742.37
	5	14186.7	2877.76	11308.9			5	13508.5	2535.21	10973.3			5	18414.9	3789.02	14625.9			5	2230.52	628.211	1602.31			5	8658.46	2548.79	6109.68			5	4269.45	2532.92	1736.53
	6	14526.1	2869.63	11656.5			6	13594.5	2653.32	10941.1			6	14169	3707.32	10461.6			6	1896.26	660.583	1235.67			6	6397.68	2501.41	3896.27			6	5696.53	2509.27	3187.26
	7	12704.4	2723.87	9980.58			7	14121.6	2566.11	11555.5			7	25899.4	3832.02	22067.4			7	1869.72	685.286	1184.43			7	7712.85	2473.73	5239.12			7	5144.49	2497.76	2646.73
	8	14180.5	2679.66	11500.8			8	14803.3	2502.52	12300.8			8	33743	3832.02	29910.9			8	1840.38	618.277	1222.1			8	7840.36	2490.02	5350.35			8	5864.29	2543.02	3321.27
	9	14945.3	2653.96	12291.3			9	17203.5	2774.15	14429.3			9	25644.2	3661.77	21982.5			9	1855.54	778.61	1076.93			9	8629.26	2506.93	6122.33			9	5530.82	2543.07	2987.75
	10	14064.5	2631.86	11432.7			10	14075	2613.63	11461.3			10	30636.6	3991.37	26645.2			10	1581.17	704.077	877.09			10	5969.38	2486.7	3482.67			10	5859.49	2562.03	3297.46
	11	14073.5	2664.69	11408.9			11	15084.8	2630.29	12454.5			11	26761.9	3326.4	23435.5			11	1832.17	631.083	1201.09			11	9532.91	2486.3	7046.61		ddr-2 RNAi	1	5570.2	2625.56	2944.64
	12	12069.1	2677.17	9391.95			12	12561.1	2672.77	9888.3			12	17521.4	4556.12	12965.3			12	1997.36	691.113	1306.25			12	8450.46	2605.28	5845.17			2	6351.44	2542.09	3809.35
	13	14580.9	2653	11927.9			13	16503.4	2679.99	13823.4			13	19494.8	4134.1	15360.7			13	2853.39	703.319	2150.07			13	10622.7	2618.57	8004.12			3	4962.31	2528.1	2434.21
	14	12870.7	2640.39	10230.3			14	17350.5	2706.42	14644.1			14	24443	3723.08	20719.9			14	2366.38	836.765	1529.61			14	7477.82	2567.65	4910.17			4	6833.52	2550.65	4282.87
	15	17871.9	2676.11	15195.8			15	16262.1	2734.35	13527.8			15	24399.4	4971.96	19427.5			15	3108.03	705.885	2402.15			15	7247.59	2479.89	4767.7			5	5056.6	2518.44	2538.16
	16	8498.07	2677.24	5820.83			16	22930.8	2840.68	20090.1			16	27058.7	3993.39	23065.3			16	2141.44	627.349	1514.09			16	7778.11	2536.52	5241.59			6	5156.52	2530.93	2625.59
	17	9900.94	2701.44	7199.5			17	23384.6	3166.55	20218			17	26790.9	3851.6	22939.3			17	1785.62	645.171	1140.45			17	8897.76	2481.02	6416.75			7	5134	2595.99	2538.01
	18	9560.95	2699.34	6861.61			18	15118.1	2827.07	12291			18	23068.7	3044.35	20024.3			18	1494.98	625.163	869.816			18	8034.26	2556.13	5478.13			8	5793.75	2577.23	3216.52
	19	11357.3	2722.92	8634.37			19	15356.9	2939.15	12417.7			19	25377.9	3213.57	22164.3			19	2461.26	682.949	1778.31			19	7906.27	2449.29	5456.97			9	4769.49	2562.09	2207.41
	20	13775.9	2704.87	11071			20	23044.6	2771.73	20272.8			20	21144.8	4374.66	16770.1			20	2598.23	718.714	1879.51			20	8492.04	2497.1	5994.94			10	5154.76	2548.01	2606.75
	21	11532.1	2702.81	8829.29			21	22816.8	3005.18	19811.6			21	27510.2	5919.76	21590.4			21	1691.48	667.1	1024.38			21	9668.98	2435.02	7233.96
	22	12165.5	2667.05	9498.49			22	32637.4	2777.96	29859.5			22	38723.4	5607.77	33115.6			22	1896.9	763.327	1133.58			22	9056.97	2487	6569.97
	23	9026.81	2665.41	6361.4			23	25688.1	2898.37	22789.8			23	30534.3	7361.22	23173.1			23	1645.22	671.186	974.038			23	8329.12	2488.56	5840.56
	24	14061.5	2675.75	11385.7			24	28383.2	2998.25	25384.9			24	18895.5	4314.82	14580.7			24	1957.2	726.683	1230.52			24	9913.32	2491.16	7422.16
	25	18303.8	3053.49	15250.3			25	14597.1	2819.17	11777.9			25	19799.2	3927.79	15871.4		him-4 RNAi (initiated at early L4)	1	1177.65	754.057	423.593			25	6585.96	2478.22	4107.73
	26	10072.8	2955.51	7117.28			26	26735.5	2958.1	23777.4		him-4 RNAi (initiated at L1)	1	16119	3220.65	12898.4			2	1624.21	725.641	898.572			26	6495.14	2552.32	3942.82
	27	21708	2808.79	18899.2			27	18833.1	2981.26	15851.8			2	23649.2	3262.69	20386.5			3	1564.32	611.55	952.772			27	7873.33	2619.1	5254.23
	28	15669.8	2820.46	12849.3			28	13213	3003.94	10209.1			3	17762	3104.98	14657.1			4	1699.26	694.451	1004.81			28	10683.3	2553.11	8130.2
	29	15285	2807.84	12477.2			29	18322.3	2824.04	15498.3			4	26381.3	3552.16	22829.1			5	1680.15	691.154	988.994			29	6500.29	2516.84	3983.45
	30	15301.6	2805.5	12496.1			30	25275.1	2959.96	22315.2			5	20853.1	3525.64	17327.5			6	2261.45	663.057	1598.4			30	7539.57	2543.38	4996.19
	31	10592.8	2888.7	7704.11			31	14570.1	2964.2	11605.9			6	18232.5	3214.07	15018.4			7	1266.79	609.66	657.128		ddr-2 RNAi	1	11833.4	2582.1	9251.35
	32	16432.2	2791.93	13640.2		ddr-2 RNAi	1	18854	2767.83	16086.2			7	16669	3271.7	13397.3			8	1694.65	653.622	1041.03			2	12816.2	2523.01	10293.2
	33	19050.4	2763.03	16287.4			2	17583.9	2653.13	14930.7			8	22128.3	3506.21	18622.1			9	1951.47	639.298	1312.18			3	7209.04	2613.34	4595.7
	34	14413.6	2684.53	11729.1			3	12971.7	2671.36	10300.4			9	24499.8	3420.26	21079.5			10	1436.64	559.4	877.238			4	11177.3	2460.31	8716.97
	35	10626.5	2979.29	7647.21			4	14257.8	2635.59	11622.3			10	28360.1	3832.64	24527.5			11	2072.05	914.618	1157.43			5	9786.2	2499.34	7286.86
	36	12984.2	2973.35	10010.8			5	18514.9	2763.69	15751.3			11	20592	4327.61	16264.4			12	1512.76	455.833	1056.93			6	9242.37	2517.32	6725.05
	37	11233.9	3087.1	8146.82			6	14511	2810.98	11700			12	24977.1	6046.4	18930.7			13	2272.22	677.288	1594.93			7	10880.7	2520.28	8360.47
	38	11313.8	2803.53	8510.26			7	13497.4	2623.37	10874.1			13	30860.2	10434.1	20426.1			14	1428.45	708.522	719.927			8	9635.15	2701.56	6933.59
	39	10357.8	2865.71	7492.11			8	18703.7	2662.33	16041.3			14	24627.8	4054.27	20573.5									9	8613.36	2526.41	6086.95
	40	16058	2906.26	13151.7			9	12994.5	2540.44	10454.1			15	13473.9	3035.24	10438.6									10	8400.61	2517.56	5883.05
	41	13316	2927.21	10388.8			10	15406	2586.18	12819.8			16	19276.3	3080.56	16195.7									11	14429.1	2665.62	11763.5
	42	14664.5	2990.09	11674.5			11	18579	2829.27	15749.8			17	18749.1	3431.78	15317.3									12	7179.86	2438.33	4741.53
	43	10342.4	2923.62	7418.83			12	21129.5	2781.95	18347.6			18	11541.8	3078.93	8462.85									13	9603.64	2577.2	7026.44
	44	15182.9	3242.26	11940.7			13	22026.6	2866.82	19159.8			19	15543.7	3273.47	12270.2									14	12432.3	2567.85	9864.48
	45	10746.3	2886.96	7859.39			14	21888.2	2998.57	18889.7			20	15565.8	3118.82	12447									15	11161.7	2533.84	8627.87
	46	9537.39	2916.96	6620.43			15	13712.4	2747.26	10965.2			21	22090.1	3650.69	18439.4									16	11539.9	2563.8	8976.13
	47	12462.3	2847.19	9615.1			16	15289.6	3002.77	12286.8			22	14254.4	3463.39	10791									17	11402.8	2530.47	8872.36
	48	9998.25	3130.36	6867.89			17	14473.2	2825.49	11647.7			23	16693.9	3317.9	13376									18	10491.6	2710.75	7780.85
	49	11162	2929.41	8232.56			18	12011.2	2771.48	9239.74			24	18528.1	3242.48	15285.6									19	12811.1	2662.72	10148.4
	50	18795.3	2994.11	15801.2			19	12534.6	2964.45	9570.13			25	17197.5	3412.83	13784.7									20	11304.2	2528.43	8775.77
	51	11303	2772.28	8530.73			20	20436.9	2751.38	17685.5			26	16008.2	3288.66	12719.6									21	10009	2508.8	7500.19
	52	8433.1	3069.47	5363.62			21	19099.6	2897.31	16202.3			27	22962.4	3302.69	19659.7									22	8712.96	2448.3	6264.66
	53	12193.3	3030.58	9162.75			22	19334.7	2934.43	16400.2															23	7764.32	2493.76	5270.56
	54	11803.9	2902.08	8901.83			23	19714.1	2875.09	16839															24	8634.73	2488.16	6146.56
	55	13531.2	3161.26	10369.9			24	12462.8	2830.8	9632.01															25	12624.7	2474	10150.7
	56	11440.2	2796.54	8643.67			25	14268.4	2823.94	11444.5															26	8874.26	2479.11	6395.15
	57	12819.4	2990.67	9828.69			26	19580.4	2846.44	16734															27	10574.2	2467.15	8107.1
	58	10972	2930.15	8041.81			27	23738.1	2782.35	20955.8															28	5920.8	2429.13	3491.67
	59	9824.15	2830.36	6993.79			28	16637.8	3041.45	13596.3															29	7107.98	2499.49	4608.5
	60	16059.3	3251.78	12807.5			29	18230	2954.75	15275.2															30	8197.65	2448.47	5749.19
	61	10984.7	2969.2	8015.51			30	10540.5	2974.29	7566.2															31	8168.78	2432.11	5736.67
	62	15979.3	3171.21	12808.1																					32	7673.13	2445.98	5227.15
	63	11007.3	2862.12	8145.22
	64	14551.3	2821.3	11730
ddr-2 RNAi	1	7594.22	2878.75	4715.48
	2	5484.61	3028.49	2456.12
	3	6781.43	2939.75	3841.68
	4	5731.67	2868.43	2863.24
	5	5094.97	2802.77	2292.2
	6	5852.4	2957.13	2895.27
	7	4515.84	2729.12	1786.72
	8	4673.69	2752.94	1920.75
	9	4256.71	2754.96	1501.75
	10	4151.96	2653.25	1498.72
	11	4333.55	2729.62	1603.93
	12	4185.67	2703.87	1481.8
	13	3911.62	2650.08	1261.54
	14	3979.68	2695.07	1284.6
	15	5609.18	2797.65	2811.53
	16	6335.85	2686.24	3649.61
	17	4608.38	2722.98	1885.4
	18	4664.62	2747.95	1916.67
	19	4661.67	2776.89	1884.78
	20	4840.09	2677.59	2162.49
	21	4746.91	2753.74	1993.17
	22	4499.82	3164.01	1335.81
	23	4281.99	2725.49	1556.51
	24	4390.87	2679.29	1711.58
	25	4546.04	2715.64	1830.4
	26	4407.91	2732.33	1675.59
	27	5223.06	2670.74	2552.32
	28	4369.05	2702.01	1667.05
	29	4821.09	2660.06	2161.03
	30	4720.12	2671.03	2049.1
	31	5948.76	2723.91	3224.85
	32	4725.35	2868.1	1857.24
	33	4274.18	2816.67	1457.51
	34	5133.88	2842.18	2291.71
	35	5202.29	2797	2405.29
	36	5011.67	2833.52	2178.15
	37	5417.94	2802.22	2615.72
	38	5368.54	2812.52	2556.02
	39	4732.26	2950.4	1781.86
	40	4550.81	2846.71	1704.1
	41	6367.66	3129.95	3237.71
	42	5245.9	2958.24	2287.66
	43	4731.23	2878.32	1852.9
	44	4594.09	3005.47	1588.62
	45	5326.78	2980.41	2346.37
	46	4802.85	2850.5	1952.35
	47	4769.53	2897	1872.52
	48	4637.69	2817.64	1820.05
	49	4433.91	2790.23	1643.68
	50	4556.51	2909.13	1647.38
	51	4397.39	2924.39	1473
	52	4578.13	2872.64	1705.49
	53	4723.87	2798.49	1925.38
	54	5635.1	2908.78	2726.32
	55	5382.06	2879.1	2502.96
	56	5618.57	2835.63	2782.94
	57	5039.9	2824.66	2215.25
	58	5956.94	2829.58	3127.37
	59	5078.53	2924.37	2154.16
	60	8083.43	2967.31	5116.12
