# Supplementary material for: Reciprocal discoidin domain receptor signaling strengthens integrin adhesion to connect adjacent tissues
Source: eLife. 2023 Jul 5;12:RP87037. doi: 10.7554/eLife.87037 (PMC10328527; doi:10.7554/eLife.87037)
Supplement: Figure 5—figure supplement 1—source data 1. — Raw data of fluorescence intensity quantification of ina-1 knockdown used to generate plots in Figure 5—figure supplement 1D and E in Microsoft Excel format. [file elife-87037-fig5-figsupp1-data1.xlsx]

## Sheet: Figure 5—figure supplement 1—So
Figure 5—figure supplement 1—Source data 1. Source data for Figure 5—figure supplement 1. Raw data of fluorescence intensity quantification of ina-1 knockdown used to generate plots in Figure 5—figure supplement 1D and E.
Treatment	Worm	INA-1::mNG Mean fluorescence intensity (utse-seam connection)				Treatment	Worm	INA-1::mNG Mean fluorescence intensity (utse-seam connection)				Treatment	Worm	INA-1::mNG Mean fluorescence intensity (utse-seam connection)
		Raw signal	Background	Corrected signal				Raw signal	Background	Corrected signal				Raw signal	Background	Corrected signal
Control RNAi	1	13104.3	4690.37	8413.89		Control RNAi	1	738.42	228.205	510.215		Control RNAi	1	603.071	235.219	367.852
	2	12797.5	4786.13	8011.35			2	658.121	210.365	447.756			2	527.589	215.634	311.955
	3	12471.7	4756.55	7715.12			3	604.895	171.75	433.145			3	591.257	198.557	392.7
	4	10882	4390	6492.02			4	636.549	200.711	435.838			4	759.786	191.24	568.546
	5	9483.06	3781.36	5701.7			5	759.41	193.141	566.269			5	721.775	269.475	452.3
	6	10764.1	3953.75	6810.31			6	789.406	241	548.406			6	722.552	256.225	466.327
	7	9582.42	4035.54	5546.88			7	550.633	207.848	342.785			7	428.414	205.457	222.957
	8	8976.94	3831.56	5145.38			8	737.133	220.089	517.044			8	442.868	186.692	256.176
	9	8146.17	3617.84	4528.33			9	811.952	193.49	618.462		ina-1 RNAi 52h treatment (L1 to young adult)	1	174.831	130.701	44.13
	10	10694.9	4086.41	6608.46			10	628.068	187.109	440.959			2	174.431	125.215	49.216
ina-1 RNAi 44h treatment (L1 to Late L4)	1	5274.55	3332.93	1941.62		ina-1 RNAi 48h treatment (L1 to young adult)	11	709.759	239.865	469.894			3	148.325	126.766	21.559
	2	6239.86	3804.24	2435.62			1	184.747	124.775	59.972			4	155.005	128.167	26.838
	3	6070.91	3483.57	2587.34			2	184.162	130.61	53.552			5	150.12	128.333	21.787
	4	4576.67	2959.55	1617.12			3	207.927	125.795	82.132			6	166.126	121.538	44.588
	5	4364.67	2887.07	1477.6			4	192.663	131.957	60.706			7	153.567	128.676	24.891
	6	3992.09	2950.2	1041.89			5	227.027	128.333	98.694
	7	4336.67	2924.99	1411.68			6	200.171	126.72	73.451
	8	4271.55	2973.44	1298.11			7	158.469	122.038	36.431
	9	4683.78	2899.44	1784.34			8	200.457	126.007	74.45
							9	187.779	128.488	59.291
							10	189.85	131.27	58.58
