# Supplementary material for: Reciprocal discoidin domain receptor signaling strengthens integrin adhesion to connect adjacent tissues
Source: eLife. 2023 Jul 5;12:RP87037. doi: 10.7554/eLife.87037 (PMC10328527; doi:10.7554/eLife.87037)
Supplement: Figure 6—figure supplement 1—source data 1. — Raw data of fluorescence intensity quantification of deb-1 knockdown at the utse-seam connection used to generate boxplot in Figure 6—figure supplement 1 in Microsoft Excel format. [file elife-87037-fig6-figsupp1-data1.xlsx]

## Sheet: Figure 6—figure supplement 1—So
Figure 6—figure supplement 1—Source data 1. Source data for Figure 6—figure supplement 1. Raw data of fluorescence intensity quantification of deb-1 knockdown at the utse-seam connection used to generate boxplot in Figure 6—figure supplement 1.
Treatment	Worm	DEB-1::mNG Mean fluorescence intensity (utse-seam connection)
		Raw signal	Background	Corrected signal
Control RNAi	1	3326.12	1240.75	2085.37
	2	3710.43	1390.42	2320.01
	3	2879.35	1670.45	1208.89
	4	4660.33	1727.89	2932.44
	5	5395.65	1419.04	3976.61
	6	4260.86	1463.1	2797.76
	7	4196.9	2104.92	2091.99
	8	4782.16	2434.6	2347.56
	9	4714.39	1886.12	2828.27
	10	4325.74	1805.38	2520.37
	11	4414.31	1556.43	2857.89
	12	4502.51	1754.55	2747.96
deb-1 RNAi	1	675.145	299.19	375.955
	2	581.021	314.133	266.888
	3	650.17	319.756	330.414
	4	582.702	311.782	270.92
	5	358.231	232.709	125.522
	6	617.468	349.635	267.833
	7	647.355	325.593	321.762
	8	513.492	276.425	237.067
	9	504.326	313.082	191.244
	10	447.442	306.17	141.272
	11	562.768	305.974	256.794
	12	535.369	238.431	296.938
