# Supplementary material for: Reciprocal discoidin domain receptor signaling strengthens integrin adhesion to connect adjacent tissues
Source: eLife. 2023 Jul 5;12:RP87037. doi: 10.7554/eLife.87037 (PMC10328527; doi:10.7554/eLife.87037)
Supplement: Figure 6—source data 1. — Raw data of fluorescence intensity quantification of TLN-1 and DEB-1 as well as INA-1 recovery after photobleaching used to generate plots in Figure 6B and D in Microsoft Excel format. [file elife-87037-fig6-data1.xlsx]

## Sheet: Figure 6—Source data 1
Figure 6—Source data 1. Source data for Figure 6. Raw data of fluorescence intensity quantification of TLN-1 and DEB-1 as well as INA-1 recovery after photobleaching used to generate plots in Figure 6B and D.
																Genotype	INA-1::mNG Mean Fluorescence Intensity (utse-seam connection)
Genotype	Developmental stage	Worm	Slice	GFP::TLN-1 Mean fluorescence intensity (utse-seam connection)				Genotype	Developmental stage	Worm	Slice	DEB-1::mNG Mean fluorescence intensity (utse-seam connection)					Worm	Bleached region			Unbleached control arm			Background			Acquisition bleach correction factor	Bleached region (Acquisition bleach corrected)			Background (Acquisition bleach corrected)			Bleached region (Acquisition bleach + background corrected)			Bleached region (normalized)
				Raw signal	Background	Corrected signal						Raw signal	Background	Corrected signal				Pre	Bleach	10min Post	Pre	Bleach	10min Post	Pre	Bleach	10min Post		Pre	Bleach	10min Post	Pre	Bleach	10min Post	Pre	Bleach	10min Post	Pre	Bleach	10min Post
Wild type	Mid L4	1	44	5549.4	2633.64	2915.76		Wild type	Mid-to-late L4	1	26	11614.1	3018.58	8595.52		Wild type	1	13.919	0.231	5.486	8.37	7.444	7.163	0.616	0.589	0.581	0.855795	11.9118	0.197689	5.486	0.527169	0.504063	0.581	11.3846	0	4.905	11.3846	0	4.905
		2	40	6562.93	3001.22	3561.72				2	26	8935.93	2701.49	6234.44			2	12.041	0.309	6.468	9.942	10.023	8.663	0.365	0.635	0.545	0.871354	10.492	0.269248	6.468	0.318044	0.55331	0.545	10.1739	0	5.923	10.1739	0	5.923
		3	37	5209.11	2660.2	2548.9				3	36	9282.41	2618.54	6663.87			3	16.43	0.148	4.109	18.812	18.337	12.371	0.589	0.444	0.585	0.657612	10.8046	0.0973266	4.109	0.387334	0.29198	0.585	10.4172	0	3.524	10.4172	0	3.524
		4	41	5541.37	2646.84	2894.53				4	25	8570.34	2712.87	5857.47			4	15.023	0.162	4.277	11.24	10.22	12.635	0.367	0.244	0.306	1	15.023	0.162	4.277	0.367	0.244	0.306	14.656	0	3.971	14.656	0	3.971
		5	44	4715.35	2656.46	2058.89				5	27	9825.58	2743.7	7081.88			5	19.356	0.057	2.816	20.037	20.432	20.519	0.255	0.345	0.327	1	19.356	0.057	2.816	0.255	0.345	0.327	19.101	0	2.489	19.101	0	2.489
		6	43	5924.23	2733.26	3190.98				6	30	10854.4	2813.9	8040.5			6	11.198	0.327	1.202	25.427	25.547	23.912	0.431	0.276	0.271	0.940418	10.5308	0.307517	1.202	0.40532	0.259555	0.271	10.1255	0.0479613	0.931	10.0775	0	0.883039
		7	29	7712.1	2854.77	4857.33				7	30	8861.64	2637.46	6224.18			7	13.042	0.403	3.119	18.542	19.615	23.154	0.406	0.327	0.305	1	13.042	0.403	3.119	0.406	0.327	0.305	12.636	0.076	2.814	12.56	0	2.738
		8	44	5119.45	2754.47	2364.98				8	30	9708.84	2649.61	7059.24			8	14.034	0.101	5.027	12.907	11.722	17.818	0.342	0.368	0.312	1	14.034	0.101	5.027	0.342	0.368	0.312	13.692	0	4.715	13.692	0	4.715
		9	33	8408.15	2914.88	5493.27				9	23	7529.51	2617.97	4911.54			9	22.382	0.146	2.171	21.311	21	18.644	0.373	0.464	0.551	0.874853	19.581	0.127729	2.171	0.32632	0.405932	0.551	19.2546	0	1.62	19.2546	0	1.62
		10	38	5440.74	2687.12	2753.62			Late L4	1	15	11437.8	2793.07	8644.68			10	14.063	0.084	1.638	27.506	27.948	26.148	0.409	0.205	0.328	0.950629	13.3687	0.0798528	1.638	0.388807	0.194879	0.328	12.9799	0	1.31	12.9799	0	1.31
	Mid-to-late L4	1	17	8910.13	2672.08	6238.05				2	16	10790.7	2746	8044.65			11	8.007	0.261	4.676	8.951	8.846	12.888	0.486	0.703	0.859	1	8.007	0.261	4.676	0.486	0.703	0.859	7.521	0	3.817	7.521	0	3.817
		2	20	11656.9	2572.98	9083.88				3	20	10514.6	2783.28	7731.3			12	13.938	0.318	5.982	15.163	15.512	21.989	0.703	0.689	0.763	1	13.938	0.318	5.982	0.703	0.689	0.763	13.235	0	5.219	13.235	0	5.219
		3	17	9354.35	2698.99	6655.36				4	21	12413	2781.14	9631.88			13	11.028	0.346	6.785	16.612	16.686	17.319	0.466	0.786	0.533	1	11.028	0.346	6.785	0.466	0.786	0.533	10.562	0	6.252	10.562	0	6.252
		4	26	10550.8	2732.99	7817.84				5	21	12752.2	3063.7	9688.55			14	23.737	0.263	2.407	26.105	26.588	33.198	0.683	0.533	0.87	1	23.737	0.263	2.407	0.683	0.533	0.87	23.054	0	1.537	23.054	0	1.537
		5	14	13555	2798.77	10756.2				6	23	8942.73	2702.8	6239.93			15	18.869	0.187	1.336	27.7	25.688	22.737	0.984	0.381	0.627	0.82083	15.4882	0.153495	1.336	0.807697	0.312736	0.627	14.6806	0	0.709	14.6806	0	0.709
		6	17	10496.4	2735.69	7760.69				7	18	10714.4	2994.05	7720.33			16	15.546	0.202	5.403	24.439	23.606	21.705	0.763	0.882	0.657	0.88813	13.8069	0.179402	5.403	0.677643	0.78333	0.657	13.1292	0	4.746	13.1292	0	4.746
		7	25	6537.43	2743.67	3793.76				8	17	9488.01	2718.88	6769.13			17	16.455	0.218	6.321	27.989	24.394	27.844	0.808	0.534	0.923	0.994819	16.3698	0.216871	6.321	0.803814	0.531234	0.923	15.5659	0	5.398	15.5659	0	5.398
		8	34	5728.78	2688.11	3040.66				9	20	10059.4	2649.44	7409.95		ddr-2(qy64)	1	6.757	0.25	4.368	18.793	16.793	18.455	0.795	0.977	0.788	0.982015	6.63547	0.245504	4.368	0.780702	0.959428	0.788	5.85477	0	3.58	5.85477	0	3.58
		9	30	7720.27	2781.64	4938.62				10	22	10023.2	2655.74	7367.44			2	10.737	0.182	5.475	12.586	11.828	14.757	0.694	0.704	0.693	1	10.737	0.182	5.475	0.694	0.704	0.693	10.043	0	4.782	10.043	0	4.782
		10	35	6907.63	2680.79	4226.84			Young adult	1	17	7479.77	2843.52	4636.24			3	15.292	0.358	8.718	11.944	11.347	9.735	0.971	0.885	0.883	0.815054	12.4638	0.291789	8.718	0.791417	0.721322	0.883	11.6724	0	7.835	11.6724	0	7.835
	Late L4	1	12	11996.2	2478.33	9517.85				2	18	10273.3	2915.77	7357.56			4	20.803	0.573	7.315	12.299	11.472	12.74	0.854	1.104	0.473	1	20.803	0.573	7.315	0.854	1.104	0.473	19.949	0	6.842	19.949	0	6.842
		2	10	13746	3290.41	10455.6				3	17	8277.68	2758.22	5519.46			5	17.917	0.22	3.145	34.167	32.769	27.844	0.895	0.886	0.91	0.814938	14.6013	0.179286	3.145	0.72937	0.722035	0.91	13.8719	0	2.235	13.8719	0	2.235
		3	8	13354.2	2578.14	10776				4	16	8360.23	2885.09	5475.13			6	13.159	0.409	7.894	9.172	8.287	8.293	0.273	0.291	0.398	0.904165	11.8979	0.369803	7.894	0.246837	0.263112	0.398	11.6511	0.106691	7.496	11.5444	0	7.38931
		4	9	14038.8	3012.2	11026.6				5	19	8806.49	2889.17	5917.31			7	12.557	0.371	7.364	9.903	11.062	10.629	1.076	0.828	0.699	1	12.557	0.371	7.364	1.076	0.828	0.699	11.481	0	6.665	11.481	0	6.665
		5	11	16309	2964.59	13344.4				6	22	10441.9	3094.65	7347.23			8	10.419	0.393	5.673	10.468	9.325	10.293	1.353	0.809	0.988	0.983282	10.2448	0.38643	5.673	1.33038	0.795475	0.988	8.91444	0	4.685	8.91444	0	4.685
		6	21	8339.04	2760.36	5578.69				7	20	8137.59	2772.63	5364.96			9	18.937	0.273	7.804	14.347	14.531	11.733	0.5	0.654	0.782	0.817802	15.4867	0.22326	7.804	0.408901	0.534842	0.782	15.0778	0	7.022	15.0778	0	7.022
		7	20	10303.4	2739.7	7563.66				8	16	6671.5	2794.02	3877.47			10	13.683	0.46	7.453	15.051	14.496	9.681	1.05	0.825	1.145	0.643213	8.80108	0.295878	7.453	0.675374	0.530651	1.145	8.12571	0	6.308	8.12571	0	6.308
		8	19	9958.06	2778.24	7179.82				9	25	6677.53	2775.48	3902.05			11	18.573	0.222	8.676	15.912	14.956	13.517	1.115	0.705	0.611	0.849485	15.7775	0.188586	8.676	0.947175	0.598887	0.611	14.8303	0	8.065	14.8303	0	8.065
		9	18	10881	2634.11	8246.93		ddr-2(qy64)	Mid-to-late L4	1	33	5979.96	2633.94	3346.03			12	16.376	0.162	7.506	14.713	15.043	14.58	0.932	0.72	0.938	0.99096	16.228	0.160536	7.506	0.923575	0.713491	0.938	15.3044	0	6.568	15.3044	0	6.568
		10	19	8694.18	2763.54	5930.64				2	35	6565.87	2512.48	4053.39
	Young adult	1	18	6760.5	3254.89	3505.61				3	28	7620.26	2745.18	4875.07
		2	20	7321.88	2764.08	4557.8				4	31	6083.68	2588.75	3494.93
		3	18	6478.23	3158.77	3319.46				5	27	6321.93	2708.83	3613.1
		4	20	9606.06	2875.62	6730.44				6	30	6663.35	2657.58	4005.77
		5	17	7288.15	2925.94	4362.21				7	30	7046.96	2726.91	4320.05
		6	17	7371.99	3549.53	3822.46				8	23	7440.5	2631.8	4808.69
		7	16	6974.78	2847.31	4127.47				9	27	7065.23	2715.22	4350.01
		8	20	10628.7	2884.99	7743.74				10	24	6772.97	2854.86	3918.1
		9	17	7544.71	2986.7	4558.01				11	28	6787.98	2634.76	4153.22
		10	19	7808.13	3018.24	4789.89			Late L4	1	19	8153.32	2772.89	5380.43
ddr-2(qy64)	Mid L4	1	28	6650.73	2739.64	3911.1				2	19	7782.7	2819.61	4963.09
		2	22	8107.79	2764.73	5343.06				3	33	7363.18	2601.72	4761.45
		3	28	5063.13	2537.79	2525.34				4	21	7629.19	2693.77	4935.43
		4	25	7940.37	2886.48	5053.89				5	21	8077.98	2745.23	5332.75
		5	37	5337.96	2545.39	2792.58				6	19	8541.15	2656.98	5884.16
		6	19	6682.73	2823.74	3858.99				7	19	8042.93	2634.54	5408.39
		7	18	7742.95	2822.54	4920.41				8	19	9440.45	2632.96	6807.49
		8	25	7670.22	2798.98	4871.24				9	21	10198.2	2720.27	7477.89
		9	27	6636.86	2673.14	3963.72				10	19	7969.99	2804.57	5165.42
		10	32	5394.1	2638.64	2755.46				11	18	8681.33	2640.28	6041.05
		11	27	6025.84	2677.32	3348.51			Young adult	1	19	7191.3	2771.65	4419.64
		12	27	5847.91	2657.77	3190.13				2	16	6640.23	3064.75	3575.48
	Mid-to-late L4	1	20	7989.02	2754.13	5234.89				3	15	7427.34	3380.7	4046.64
		2	23	7917.56	2614.9	5302.65				4	14	6205.97	2714.59	3491.38
		3	17	9390.2	2792.76	6597.44				5	16	7073.51	2746.72	4326.79
		4	21	8278.91	2841.63	5437.27				6	14	6585.81	2931.66	3654.15
		5	18	7583.5	2808.05	4775.45				7	17	7596.18	3027.51	4568.67
		6	20	7667	2828.7	4838.3				8	16	7411.78	2918.71	4493.07
		7	21	7070.66	2815.38	4255.28				9	18	6397.18	2711.91	3685.27
		8	16	10621.2	2822.66	7798.54				10	18	7815.02	2987.87	4827.16
		9	9	13994.3	3211.95	10782.3
		10	10	9347.15	3604.94	5742.21
	Late L4	1	20	10631.5	2885.77	7745.69
		2	20	6990.34	2546.58	4443.76
		3	19	6621.17	2482.77	4138.4
		4	11	11850.2	2714.73	9135.42
		5	12	12341.8	2701.28	9640.52
		6	10	9711.27	2797.03	6914.24
		7	9	13257.6	2848.19	10409.4
		8	8	14841.3	2866.47	11974.8
		9	20	9289.92	2674.28	6615.64
		10	8	12623.3	3044.95	9578.39
		11	10	13541.9	2919.92	10622
	Young adult	1	7	9985.14	2985.88	6999.26
		2	5	9040.67	2919.87	6120.8
		3	5	7869.41	2952.26	4917.15
		4	18	6483.32	2663.36	3819.96
		5	13	6021.38	2611.39	3409.99
		6	16	4979.54	2603.51	2376.03
		7	19	5582.03	2613.26	2968.77
		8	18	8631.3	2670.41	5960.89
		9	15	5329.31	2577.78	2751.54
		10	16	6581.48	2665.83	3915.66
		11	7	7519.27	2944.24	4575.03
		12	16	5599	2657.64	2941.36
		13	21	9675.7	2850.5	6825.21
