# Supplementary material for: Reciprocal discoidin domain receptor signaling strengthens integrin adhesion to connect adjacent tissues
Source: eLife. 2023 Jul 5;12:RP87037. doi: 10.7554/eLife.87037 (PMC10328527; doi:10.7554/eLife.87037)
Supplement: Figure 7—source data 1. — Raw data of fluorescence intensity quantification used to generate boxplots in Figure 7B and D in Microsoft Excel format. Note that source data for Figure 7—figure supplement 1 is also found within Figure 7—source data 1. [file elife-87037-fig7-data1.xlsx]

## Sheet: Figure 7—Source data 1
Figure 7—Source data 1. Source data for Figure 7. Raw data of fluorescence intensity quantification of INA-1::mNG for photobleaching experiments used to generate boxplots in Figure 7B and D as well as Figure 7—figure supplement 1.
Treatment	INA-1::mNG Mean Fluorescence Intensity (utse-seam connection)
	Worm	Bleached region			Unbleached control arm			Background			Acquisition bleach correction factor	Bleached region (Acquisition bleach corrected)			Background (Acquisition bleach corrected)			Bleached region (Acquisition bleach + background corrected)			Bleached region (normalized)
		Pre	Bleach	10min Post	Pre	Bleach	10min Post	Pre	Bleach	10min Post		Pre	Bleach	10min Post	Pre	Bleach	10min Post	Pre	Bleach	10min Post	Pre	Bleach	10min Post
Control RNAi	1	8570.36	337.882	2756.81	6580.02	6271.37	6358.94	756.698	847.009	1140.16	0.966401	8282.41	326.53	2756.81	731.274	818.551	1140.16	7551.14	0	1616.65	7551.14	0	1616.65
	2	9366.3	313.412	2166.93	7685.59	8036.27	6984.5	930.886	865.975	874.564	0.908779	8511.89	284.822	2166.93	845.969	786.98	874.564	7665.92	0	1292.37	7665.92	0	1292.37
	3	8888.04	369.439	1872.43	9125.34	7770.73	7466.59	851.588	725.843	751.646	0.818226	7272.42	302.285	1872.43	696.791	593.903	751.646	6575.63	0	1120.79	6575.63	0	1120.79
	4	7518.48	539.484	1303.27	8076.31	7224.34	8310.35	930.458	833.946	1077.14	1	7518.48	539.484	1303.27	930.458	833.946	1077.14	6588.03	0	226.127	6588.03	0	226.127
	5	9111.96	322.433	2017.66	6894.48	6664.6	8394.54	911.023	1044.88	1136.5	1	9111.96	322.433	2017.66	911.023	1044.88	1136.5	8200.94	0	881.163	8200.94	0	881.163
	6	9062.13	475.689	1279.74	8715.22	8640.62	9285.25	938.392	872.679	919.656	1	9062.13	475.689	1279.74	938.392	872.679	919.656	8123.74	0	360.084	8123.74	0	360.084
	7	7326.67	465.3	1185.66	10904.6	10678.7	9634.6	869.592	758.882	1045.95	0.883535	6473.36	411.109	1185.66	768.315	670.498	1045.95	5705.05	0	139.704	5705.05	0	139.704
	8	9859.88	323.922	1588.15	7655.75	7096.18	6583.01	452.42	573.357	475.78	0.859878	8478.29	278.533	1588.15	389.026	493.017	475.78	8089.26	0	1112.37	8089.26	0	1112.37
	9	6012.18	256.247	1795.25	5956.37	6245.63	6442.87	871.906	904.891	736.533	1	6012.18	256.247	1795.25	871.906	904.891	736.533	5140.27	0	1058.72	5140.27	0	1058.72
	10	9726.13	450.173	2321.61	8053.73	7572.7	8385.22	960.829	929.514	1053.94	1	9726.13	450.173	2321.61	960.829	929.514	1053.94	8765.3	0	1267.67	8765.3	0	1267.67
	11	7818.61	591.287	1150.88	8760.48	8340.07	8049.93	1002.23	993.038	822.163	0.918892	7184.45	543.329	1150.88	920.939	912.494	822.163	6263.52	0	328.714	6263.52	0	328.714
	12	7859	445.92	1790.22	7193.53	7600.95	8498.82	1015.04	1022	933.794	1	7859	445.92	1790.22	1015.04	1022	933.794	6843.96	0	856.428	6843.96	0	856.428
	13	7698.99	466.615	1805.49	7663.27	7520.29	8460.95	820.173	1038.72	801.357	1	7698.99	466.615	1805.49	820.173	1038.72	801.357	6878.82	0	1004.13	6878.82	0	1004.13
	14	6919.85	504.856	2231.53	8329.76	8785.81	8738.64	976.897	634.029	757.367	1	6919.85	504.856	2231.53	976.897	634.029	757.367	5942.95	0	1474.17	5942.95	0	1474.17
	15	10087.2	341.429	1370.92	7781.53	7573.62	8606.64	1026.13	1100.63	712.45	1	10087.2	341.429	1370.92	1026.13	1100.63	712.45	9061.08	0	658.471	9061.08	0	658.471
	16	8001.2	213.235	2061.31	7814.74	7679.13	7516.15	818.253	594.76	844.873	0.961791	7695.49	205.088	2061.31	786.989	572.035	844.873	6908.5	0	1216.44	6908.5	0	1216.44
let-60 RNAi	1	11262	452.327	2967.64	8276.43	8265.83	6748.28	824.217	622.47	741.315	0.815361	9182.59	368.81	2967.64	672.035	507.538	741.315	8510.56	0	2226.32	8510.56	0	2226.32
	2	6841.73	288.09	2867.01	7333.04	6963.75	6913.54	820.97	877.388	937.694	0.942794	6450.34	271.61	2867.01	774.006	827.196	937.694	5676.34	0	1929.32	5676.34	0	1929.32
	3	8047.29	368.535	2348.89	6141.97	6105.41	6419.43	799.597	701.195	844.607	1	8047.29	368.535	2348.89	799.597	701.195	844.607	7247.69	0	1504.29	7247.69	0	1504.29
	4	7657.6	261.266	1692.46	6665.2	7192.13	8117.63	863.017	823.776	788.025	1	7657.6	261.266	1692.46	863.017	823.776	788.025	6794.58	0	904.436	6794.58	0	904.436
	5	7146.21	468.436	1622.68	7088.3	7032.43	6271.81	1173.19	1030.82	878.878	0.884812	6323.05	414.478	1622.68	1038.05	912.084	878.878	5285	0	743.801	5285	0	743.801
	6	8630.81	538.278	1758.92	6399.46	6069.34	6489.34	939.8	823.6	697.018	1	8630.81	538.278	1758.92	939.8	823.6	697.018	7691.01	0	1061.91	7691.01	0	1061.91
	7	4747.61	475.574	1690.64	4109.16	3988.97	5540.55	861.529	660.129	879.364	1	4747.61	475.574	1690.64	861.529	660.129	879.364	3886.08	0	811.275	3886.08	0	811.275
	8	5401.42	452.699	1709.78	5536.49	5167.73	5997.05	849.788	936.888	781.435	1	5401.42	452.699	1709.78	849.788	936.888	781.435	4551.63	0	928.347	4551.63	0	928.347
	9	7242.78	361.219	2641.81	6437.38	5797.3	6084.09	1262.17	900.552	958.069	0.945118	6845.28	341.395	2641.81	1192.9	851.128	958.069	5652.38	0	1683.74	5652.38	0	1683.74
	10	11861.2	281.521	2053.28	5223.55	4833.32	4057.8	711.121	562.833	613.086	0.776827	9214.13	218.693	2053.28	552.418	437.224	613.086	8661.71	0	1440.19	8661.71	0	1440.19
	11	5662.49	184.626	1594.27	6298.76	5559.42	4564.31	303.59	218.951	297.157	0.724637	4103.25	133.787	1594.27	219.992	158.66	297.157	3883.26	0	1297.11	3883.26	0	1297.11
	12	5175.16	298.087	1277.69	6206.86	5518.62	4226.04	710.847	647.388	420.797	0.680865	3523.59	202.957	1277.69	483.991	440.784	420.797	3039.59	0	856.891	3039.59	0	856.891
	13	6420.99	260.114	1545.34	4848.75	5559.55	4078.34	814.108	519.1	633.111	0.841111	5400.76	218.785	1545.34	684.755	436.621	633.111	4716.01	0	912.227	4716.01	0	912.227
	14	7536.44	317.869	1440.54	5687.96	6182.36	4597.88	577.853	430.432	362.356	0.808354	6092.11	256.951	1440.54	467.11	347.941	362.356	5625	0	1078.19	5625	0	1078.19
	15	6280.58	302.05	1203.75	7455.21	7514.03	6251.82	567.786	578.111	490.017	0.838584	5266.8	253.294	1203.75	476.136	484.795	490.017	4790.66	0	713.733	4790.66	0	713.733
	16	6931.72	297.125	1729.13	7129.62	7763.61	4623.51	905.692	630.963	494.246	0.648492	4495.17	192.683	1729.13	587.334	409.175	494.246	3907.83	0	1234.88	3907.83	0	1234.88
	17	3245.8	372.17	1638.77	3704.39	3202.85	2746.15	643.269	588.237	448.557	0.741324	2406.19	275.899	1638.77	476.871	436.074	448.557	1929.31	0	1190.22	1929.31	0	1190.22
	18	4960.96	354.629	1952.06	4175.43	4314.72	5373.66	681.826	749.492	739.274	1	4960.96	354.629	1952.06	681.826	749.492	739.274	4279.13	0	1212.78	4279.13	0	1212.78
	19	9026.91	224.934	2445.25	6018.21	5401.83	5200.32	701.828	660.051	426.769	0.864098	7800.14	194.365	2445.25	606.448	570.349	426.769	7193.69	0	2018.48	7193.69	0	2018.48
	20	4918.04	256.817	2410.39	4040.22	4800.03	5082.74	834.314	844.395	633.163	1	4918.04	256.817	2410.39	834.314	844.395	633.163	4083.72	0	1777.23	4083.72	0	1777.23
	21	4084.33	76.474	1947.07	5423.9	5170.15	3545.85	503.477	518.408	485.125	0.653747	2670.11	49.9946	1947.07	329.146	338.907	485.125	2340.97	0	1461.94	2340.97	0	1461.94
	22	3614.29	439.771	1521.62	5532.9	5896.1	3764.96	762.597	792.131	725.643	0.680468	2459.41	299.25	1521.62	518.923	539.02	725.643	1940.49	0	795.975	1940.49	0	795.975
	23	3635.81	286.693	1527.62	4753.33	4415.33	4316.83	698.123	601.443	599.914	0.908171	3301.93	260.366	1527.62	634.015	546.213	599.914	2667.92	0	927.705	2667.92	0	927.705
	24	7020.87	271.691	1353.86	4363.09	4606.16	3036.35	445.873	438.599	443.878	0.695916	4885.94	189.074	1353.86	310.29	305.228	443.878	4575.65	0	909.981	4575.65	0	909.981
	25	7003.83	201.215	1389.07	5982.27	5642.08	5524.34	571.268	830.927	384.822	0.923451	6467.69	185.812	1389.07	527.538	767.32	384.822	5940.15	0	1004.25	5940.15	0	1004.25
Genotype	INA-1::mNG Mean Fluorescence Intensity (utse-seam connection)
	Worm	Bleached region			Unbleached control arm			Background			Acquisition bleach correction factor	Bleached region (Acquisition bleach corrected)			Background (Acquisition bleach corrected)			Bleached region (Acquisition bleach + background corrected)			Bleached region (normalized)
		Pre	Bleach	10min Post	Pre	Bleach	10min Post	Pre	Bleach	10min Post		Pre	Bleach	10min Post	Pre	Bleach	10min Post	Pre	Bleach	10min Post	Pre	Bleach	10min Post
Wild type	1	9283.96	384.01	1479.57	4958.16	5141.9	4873.51	848.197	950.358	812.468	0.982927	9125.46	377.454	1479.57	833.716	934.132	812.468	8291.74	0	667.103	8291.74	0	667.103
	2	7331.35	528.49	1524.17	8350.78	7839.98	7045.45	924.263	982.667	977.926	0.843688	6185.37	445.88	1524.17	779.789	829.064	977.926	5405.58	0	546.241	5405.58	0	546.241
	3	7494.39	521.967	2814.04	5745.92	6136.33	5598.38	596.907	594.848	641.014	0.974322	7301.94	508.564	2814.04	581.58	579.573	641.014	6720.36	0	2173.03	6720.36	0	2173.03
	4	11814.3	441.905	3830.03	6783.68	6966.17	6459.98	771.992	975.911	804.011	0.952283	11250.5	420.818	3830.03	735.155	929.343	804.011	10515.4	0	3026.02	10515.4	0	3026.02
	5	7317.4	569.179	1695.51	7250.76	7581.7	7259.27	733.076	800.306	824.236	1	7317.4	569.179	1695.51	733.076	800.306	824.236	6584.33	0	871.271	6584.33	0	871.271
	6	13962.4	221.415	5086.18	5943.47	5145.18	5924.06	607.49	617.682	646.523	0.996734	13916.8	220.692	5086.18	605.506	615.665	646.523	13311.3	0	4439.66	13311.3	0	4439.66
	7	9190.14	301.685	1371.62	10939	10889.4	10867.8	800.253	807.259	797.508	0.993492	9130.33	299.722	1371.62	795.045	802.006	797.508	8335.29	0	574.112	8335.29	0	574.112
	8	7163.5	311.179	1186.76	8551.02	9094.56	7681.39	996.131	1031.04	782.713	0.898301	6434.98	279.532	1186.76	894.826	926.181	782.713	5540.15	0	404.051	5540.15	0	404.051
	9	6739.24	529.293	2515.91	7464.91	7200.27	8502.56	627.449	540.937	601.943	1	6739.24	529.293	2515.91	627.449	540.937	601.943	6111.8	0	1913.97	6111.8	0	1913.97
	10	10976.2	229.908	3815.08	5592.13	5611	5317.79	832.434	797.689	869.641	0.950941	10437.8	218.629	3815.08	791.596	758.556	869.641	9646.16	0	2945.44	9646.16	0	2945.44
	11	8089.48	443.331	1288.02	8588.9	8371.67	5607.49	1012.17	920.111	672.709	0.652877	5281.44	289.441	1288.02	660.821	600.719	672.709	4620.62	0	615.313	4620.62	0	615.313
	12	11636	383.301	3856.06	5962.94	6436.78	5361.84	1511.89	1463.55	959.471	0.899195	10463	344.662	3856.06	1359.48	1316.01	959.471	9103.5	0	2896.59	9103.5	0	2896.59
	13	7293.75	307.478	3115.55	6367	5736.01	5589.94	687.602	672.347	498.481	0.877956	6403.59	269.952	3115.55	603.684	590.291	498.481	5799.91	0	2617.07	5799.91	0	2617.07
	14	11383.6	303.075	5386.91	7029.12	6941.2	6209.58	644.954	635.292	610.61	0.883409	10056.4	267.739	5386.91	569.758	561.222	610.61	9486.62	0	4776.31	9486.62	0	4776.31
	15	7181.35	491.768	1922.41	6485.02	6551.2	6452.19	851.32	657.726	716.207	0.994938	7145	489.279	1922.41	847.011	654.397	716.207	6297.99	0	1206.2	6297.99	0	1206.2
	16	13043.1	302.354	1933.79	14289.5	12625.9	11900.5	743.065	679.13	747.391	0.832817	10862.5	251.806	1933.79	618.837	565.591	747.391	10243.7	0	1186.4	10243.7	0	1186.4
	17	10035.7	365.925	5248.44	5381.25	4919.95	4371.61	956.568	751.31	786.08	0.812379	8152.81	297.27	5248.44	777.096	610.349	786.08	7375.72	0	4462.36	7375.72	0	4462.36
let-60(qy203)	1	8316.16	320.651	2009.42	5655.68	5363.94	6726.34	794.625	737.135	680.482	1	8316.16	320.651	2009.42	794.625	737.135	680.482	7521.53	0	1328.94	7521.53	0	1328.94
	2	6035.5	163.245	1359.31	6066.46	5737.16	3677.14	672.879	616.323	752.662	0.606142	3658.37	98.9496	1359.31	407.86	373.579	752.662	3250.51	0	606.646	3250.51	0	606.646
	3	6811.22	289.026	1749.74	7360.81	6584.33	7044.06	1172.37	1006.26	905.506	0.956968	6518.12	276.589	1749.74	1121.92	962.963	905.506	5396.2	0	844.233	5396.2	0	844.233
	4	6038.32	398.118	1720.25	5991.74	6066.72	4505.29	999.129	789.879	771.363	0.751918	4540.32	299.352	1720.25	751.263	593.924	771.363	3789.06	0	948.884	3789.06	0	948.884
	5	8804.96	374.375	3050.82	7931.64	7560.16	6824.05	944.867	840.827	982.583	0.860357	7575.41	322.096	3050.82	812.923	723.412	982.583	6762.49	0	2068.24	6762.49	0	2068.24
	6	14069.4	335.194	2996.49	11652.2	11613.7	8760.72	1150.75	994.924	971.897	0.751851	10578.1	252.016	2996.49	865.19	748.035	971.897	9712.9	0	2024.6	9712.9	0	2024.6
	7	7344.21	422.51	2125.01	6813.91	5995.8	5803.7	1030.91	1051.89	915.434	0.851743	6255.38	359.87	2125.01	878.069	895.938	915.434	5377.31	0	1209.58	5377.31	0	1209.58
	8	6361.5	381.441	1490.5	5037.9	4992.5	5122.11	696.622	793.05	960.357	1	6361.5	381.441	1490.5	696.622	793.05	960.357	5664.88	0	530.143	5664.88	0	530.143
	9	9015.14	215.252	1615.32	10225.1	9702.79	6915.07	1042.62	1031.02	961.746	0.676281	6096.76	145.571	1615.32	705.104	697.26	961.746	5391.66	0	653.573	5391.66	0	653.573
	10	7870.88	301.422	1162.62	8128.85	7462.46	6596.09	949.049	973.104	680.461	0.811441	6386.76	244.586	1162.62	770.098	789.617	680.461	5616.66	0	482.161	5616.66	0	482.161
	11	6386.46	265.341	2973.82	7040.94	6182.8	5889.64	1178.81	1180.06	994.401	0.836484	5342.17	221.953	2973.82	986.056	987.104	994.401	4356.11	0	1979.42	4356.11	0	1979.42
	12	13331.2	258.337	1992.02	7208.84	7049.14	6091.74	752.136	773.551	936.762	0.845038	11265.4	218.305	1992.02	635.583	653.68	936.762	10629.8	0	1055.26	10629.8	0	1055.26
	13	7819.77	250.589	2401.44	5679.65	5483.35	5435.66	687.56	633.307	645.471	0.957041	7483.83	239.824	2401.44	658.023	606.1	645.471	6825.81	0	1755.97	6825.81	0	1755.97
	14	7782.13	523.706	2204.64	8307.81	8046.41	7530.98	816.218	916.85	562.696	0.906494	7054.45	474.736	2204.64	739.897	831.119	562.696	6314.56	0	1641.95	6314.56	0	1641.95
	15	7110.46	305.181	1919.26	6757.39	7080.38	6633.63	720.392	632.075	595.833	0.981685	6980.23	299.592	1919.26	707.198	620.499	595.833	6273.03	0	1323.43	6273.03	0	1323.43
	16	8404.79	515.404	1630.07	7963.33	8193.2	6637.88	937.832	1088.08	779.944	0.833555	7005.86	429.618	1630.07	781.735	906.978	779.944	6224.12	0	850.125	6224.12	0	850.125
	17	8460.18	244.038	2109.18	8417.42	8996.87	7039.64	1092.77	1038.42	1111.73	0.836318	7075.41	204.093	2109.18	913.9	868.453	1111.73	6161.51	0	997.446	6161.51	0	997.446
